# Supplementary material for: One-step additive manufacturing of Ni–Mn–Sn alloys with a large elastocaloric effect
Source: Royal Society of Chemistry journal article supplement (doi:10.1039/d4tc02734e), 2024-01-01
Supplement: d4tc02734e1.pdf [file d4tc02734e1.pdf]

## Supplementary Information

### One-Step additive manufacturing of Ni-Mn-Sn alloys with large elastocaloric effect

Wen Sun,<sup>ab</sup> Hanyang qian,<sup>ab</sup> Qi Fu,<sup>c</sup> Mingxiao Zhang,<sup>ab</sup> Juan Cheng,<sup>d</sup> Zhaojun Mo,<sup>c</sup> Jian Liu,<sup>e</sup> W. Li,<sup>f</sup> and Guowei Li,<sup>\*ab</sup>

<sup>a</sup> Zhejiang Province Key Laboratory of Magnetic Materials and Application Technology, Ningbo Institute of Materials Technology and Engineering, Chinese Academy of Sciences, Ningbo 315201, China.

<sup>b</sup> University of Chinese Academy of Sciences, Beijing 100049, China.

<sup>c</sup> Key Laboratory of Rare Earths, Ganjiang Innovation Academy, Chinese Academy of Sciences, Ganzhou 341119, China.

<sup>d</sup> Baotou Research Institute of Rare Earths, Baotou, 0472, China.

<sup>e</sup> School of Materials Science and Engineering, Shanghai University, Shanghai 200444, China.

<sup>f</sup> CISRI & NIMTE Joint Innovation Center for Rare Earth Permanent Magnets.

\* Authors to whom correspondence should be addressed: Guowei Li, E-mail addresses: [liguowei@nimte.ac.cn](mailto:liguowei@nimte.ac.cn)

Table S1 L-PBF parameters for the P50 - P180 samples and relative density measured by micro-CT.

| Samples          | Scanning strategy       | Laser power | Scanning speed              | Hatching spacing | Layer thickness | Energy density            | Relative density |
|------------------|-------------------------|-------------|-----------------------------|------------------|-----------------|---------------------------|------------------|
|                  |                         | $P$ (W)     | $\nu$ (mm s <sup>-1</sup> ) | $H$ ( $\mu$ m)   | $d$ ( $\mu$ m)  | $E$ (J mm <sup>-3</sup> ) | $\rho$ (%)       |
| P <sub>50</sub>  | unidirectional strategy | 50          | 1000                        | 100              | 20              | 25                        | 92.45            |
| P <sub>60</sub>  |                         | 60          | 1000                        | 100              | 20              | 30                        | 95.26            |
| P <sub>100</sub> |                         | 100         | 2000                        | 100              | 20              | 25                        | 96.68            |
| P <sub>120</sub> |                         | 120         | 2000                        | 100              | 20              | 30                        | 95.44            |
| P <sub>150</sub> |                         | 150         | 3000                        | 100              | 20              | 25                        | 98.20            |
| P <sub>180</sub> |                         | 180         | 3000                        | 100              | 20              | 30                        | 93.58            |

Table S2 The elemental compositions of the samples via the ICP-OES test.

| Element | Ni (at. %) | Mn (at. %) | Sn (at. %) |
|---------|------------|------------|------------|
| Powder  | 43.88      | 43.79      | 12.33      |
| P50     | 44.53      | 42.81      | 12.66      |
| P150    | 44.85      | 42.52      | 12.62      |
| P180    | 45.62      | 41.78      | 12.60      |

Table S3 The statistics of cracks. The  $n_1$  and  $n_2$  are the numbers of red cracks and purple/blue cracks, respectively. The  $V_1$ ,  $V_2$  and  $V$  are the volumes of red crack, purple/blue crack and sample, respectively.

| Samples          | Red cracks |                 | Purple and blue cracks |                 | Total crack defects |               |
|------------------|------------|-----------------|------------------------|-----------------|---------------------|---------------|
|                  | $n_1$      | $n_1/(n_1+n_2)$ | $V_1/V$                | $n_2/(n_1+n_2)$ | $V_2/V$             | $(V_1+V_2)/V$ |
|                  |            | (%)             | (%)                    | (%)             | (%)                 | (%)           |
| P <sub>50</sub>  | 7          | 0.012           | 3.34                   | 99.988          | 3.11                | 6.45          |
| P <sub>60</sub>  | 1          | 0.020           | 3.34                   | 99.980          | 1.17                | 4.51          |
| P <sub>100</sub> | 1          | 0.002           | 2.16                   | 99.998          | 1.01                | 3.17          |
| P <sub>120</sub> | 1          | 0.014           | 3.61                   | 99.986          | 0.83                | 4.44          |
| P <sub>150</sub> | 1          | 0.005           | 0.36                   | 99.995          | 1.21                | 1.57          |
| P <sub>180</sub> | 1          | 0.005           | 2.67                   | 99.995          | 1.11                | 3.78          |

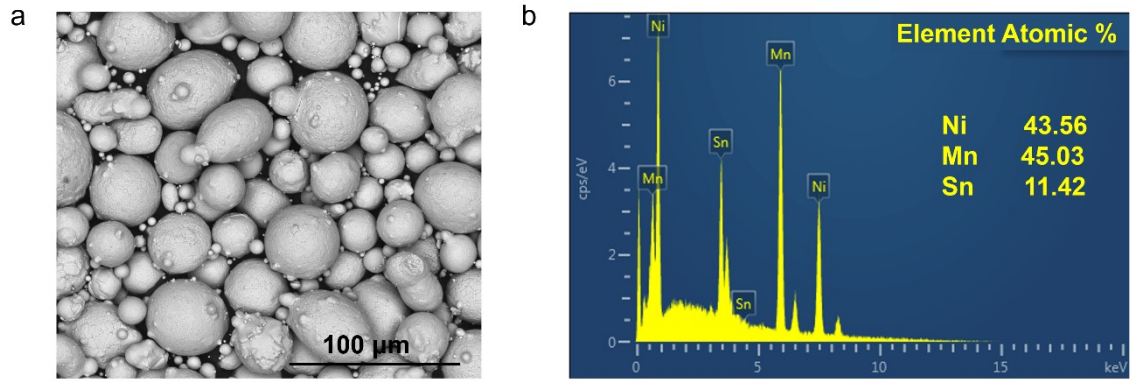

Fig. S1 (a) Backscattered scanning electron morphology (SEM) and (b) energy dispersive spectrum (EDS) of Ni-Mn-Sn powder for 3D printing.

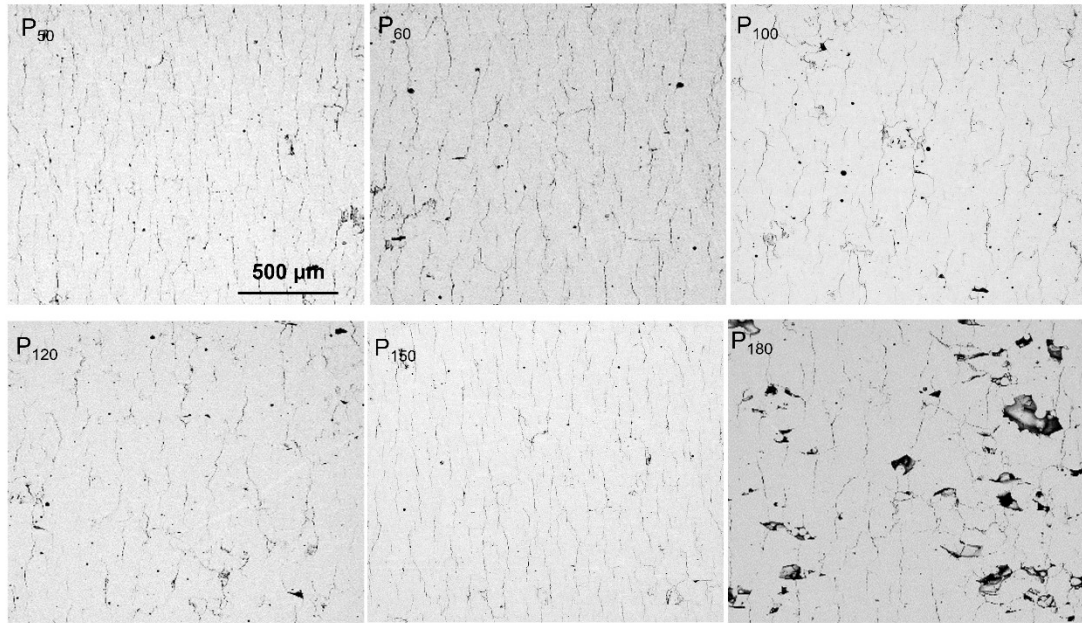

Fig. S2 Backscattered SEM microstructures in the TD - BD plane (perpendicular to the SD) in P<sub>50</sub> - P<sub>180</sub> samples.

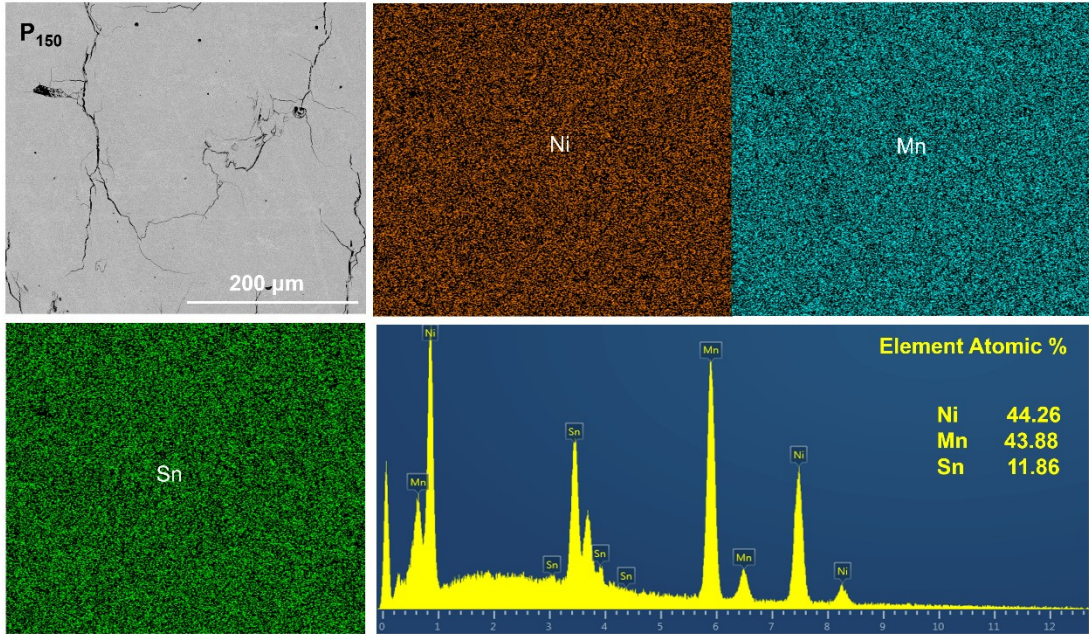

Fig. S3 The SEM and Ni, Mn, Sn elemental mapping images and EDS of P<sub>150</sub> sample.

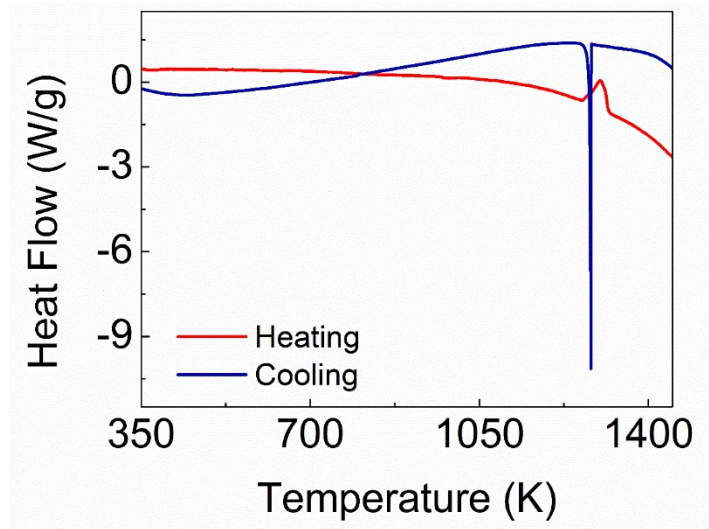

Fig. S4 Differential thermal analysis (DTA) curves of the P<sub>150</sub> samples.



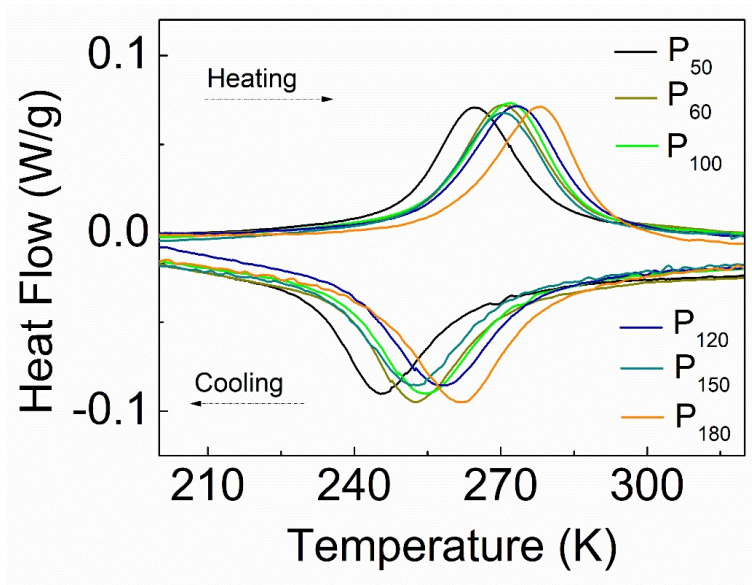

Fig. S5 DSC curves of alloys with different laser power.

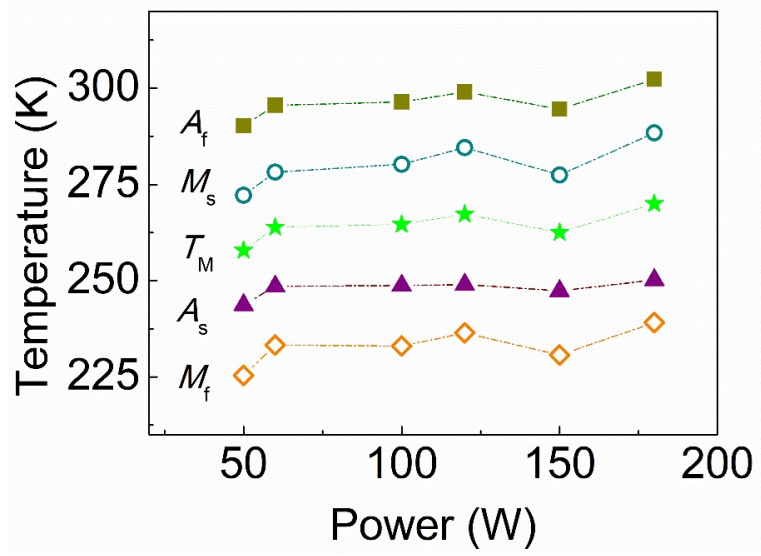

Fig. S6 Transformation characteristic temperature ( $M_s$ ,  $M_f$ ,  $A_s$ ,  $A_f$ ) and average characteristic temperatures ( $T_M = (M_s + M_f + A_s + A_f) / 4$ ) in L-PBF Ni-Mn-Sn alloys.

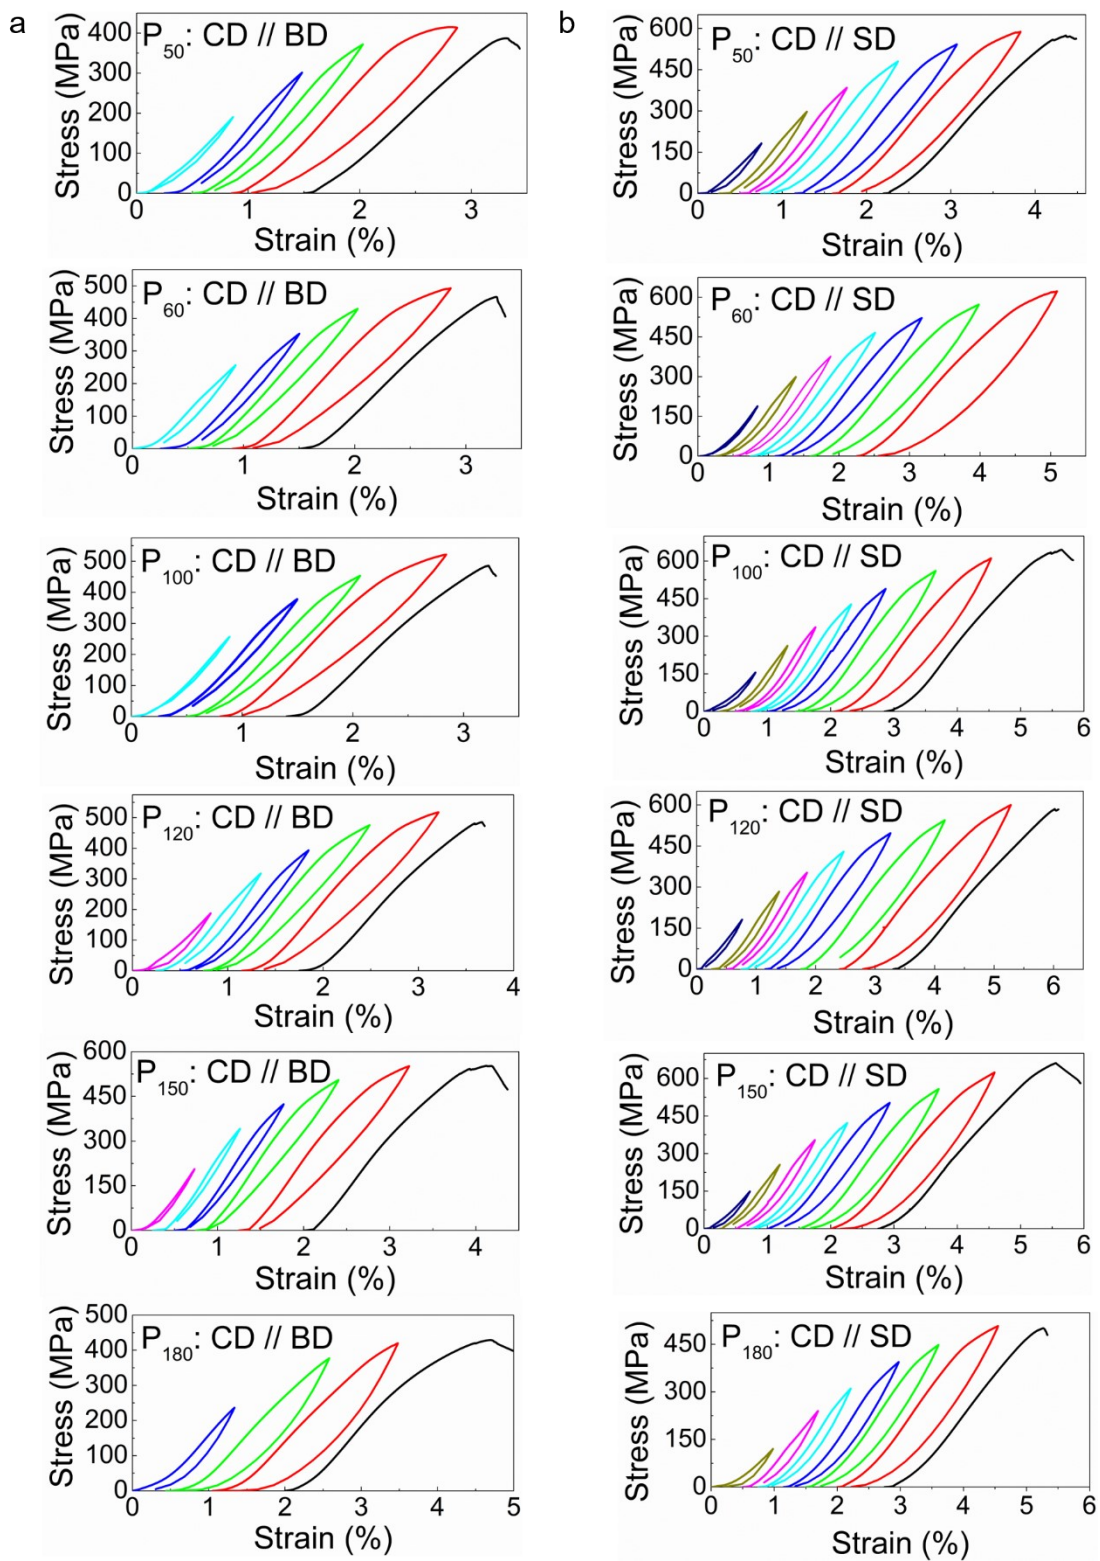

Fig. S7 Stress - strain curves at room temperature under compression along the (a) BD and (d) SD in  $P_{50}$  -  $P_{180}$  samples.

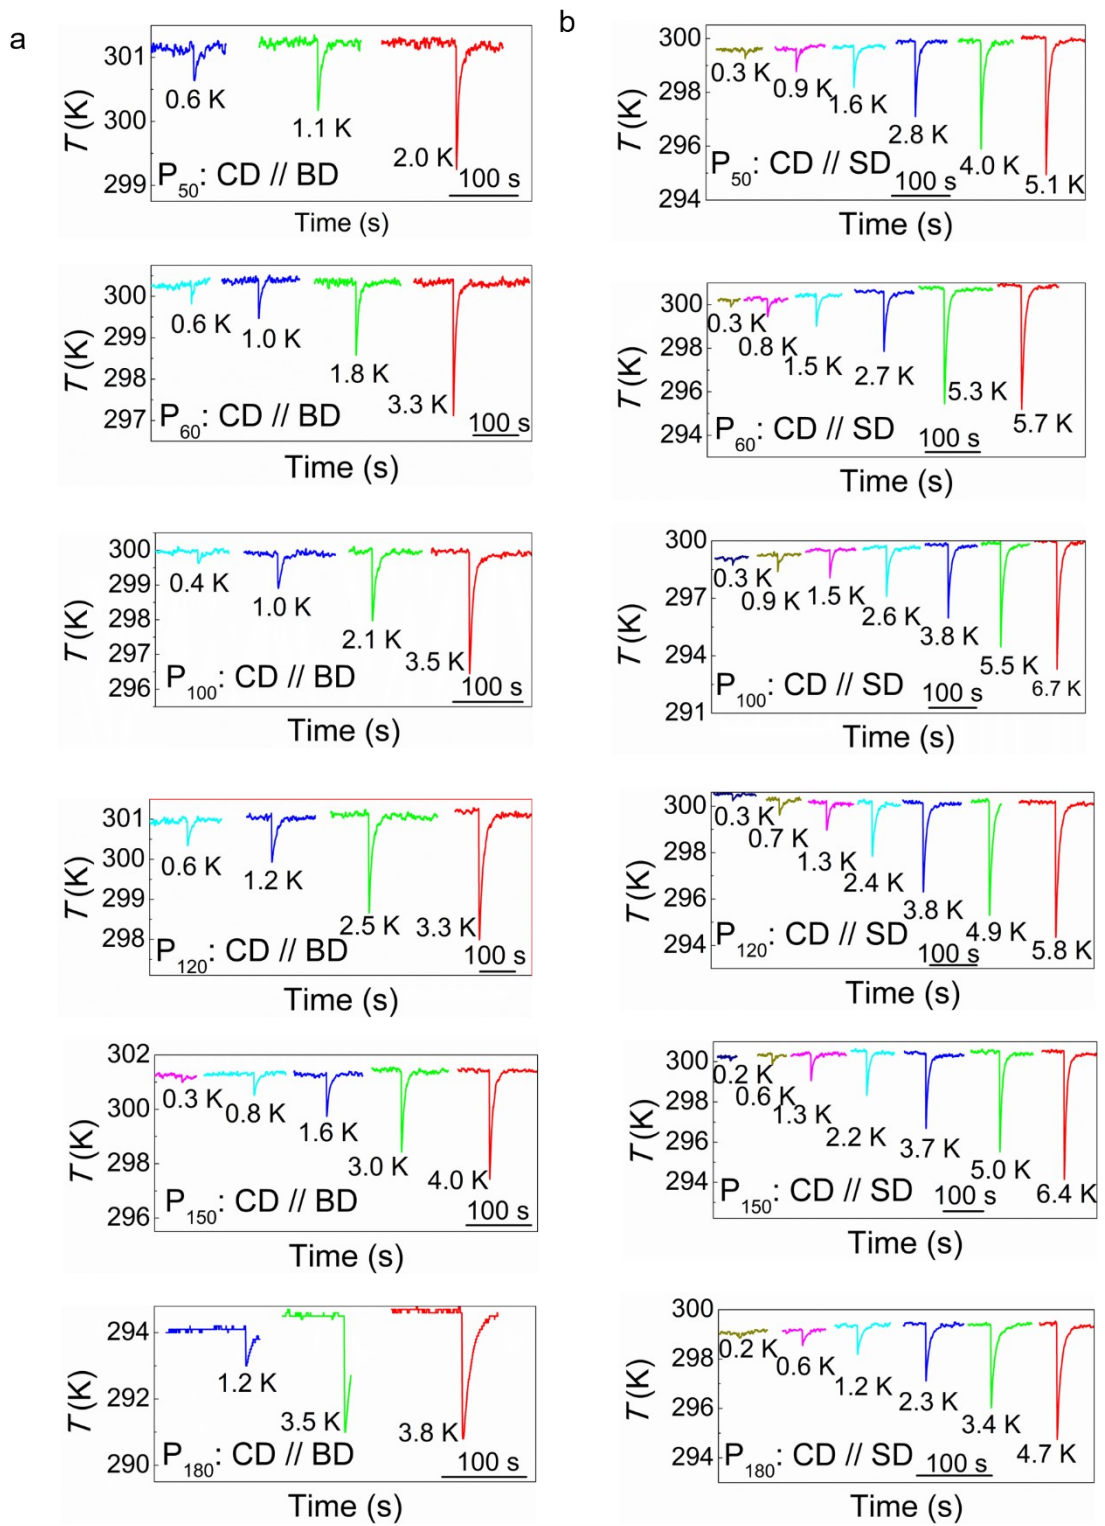

Fig. S8 corresponding elastocaloric temperature changes upon unloading in Fig. S7. (a) unloading temperature changes after compression along the BD and (b) after compression along SD in  $P_{50}$  -  $P_{180}$  samples.

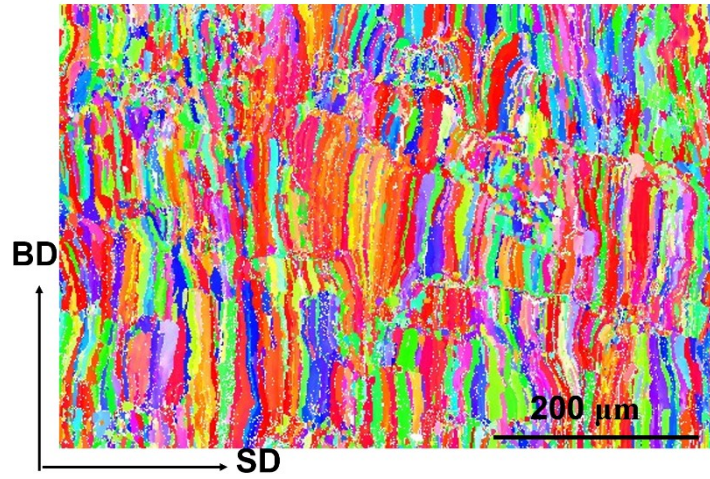

Fig. S9 EBSD mapping of sample P<sub>180</sub> in the building - scanning direction (BD - SD) plane. the Inverse Pole Figures are plotted with the  $\langle 001 \rangle$  directions parallel to the SD.



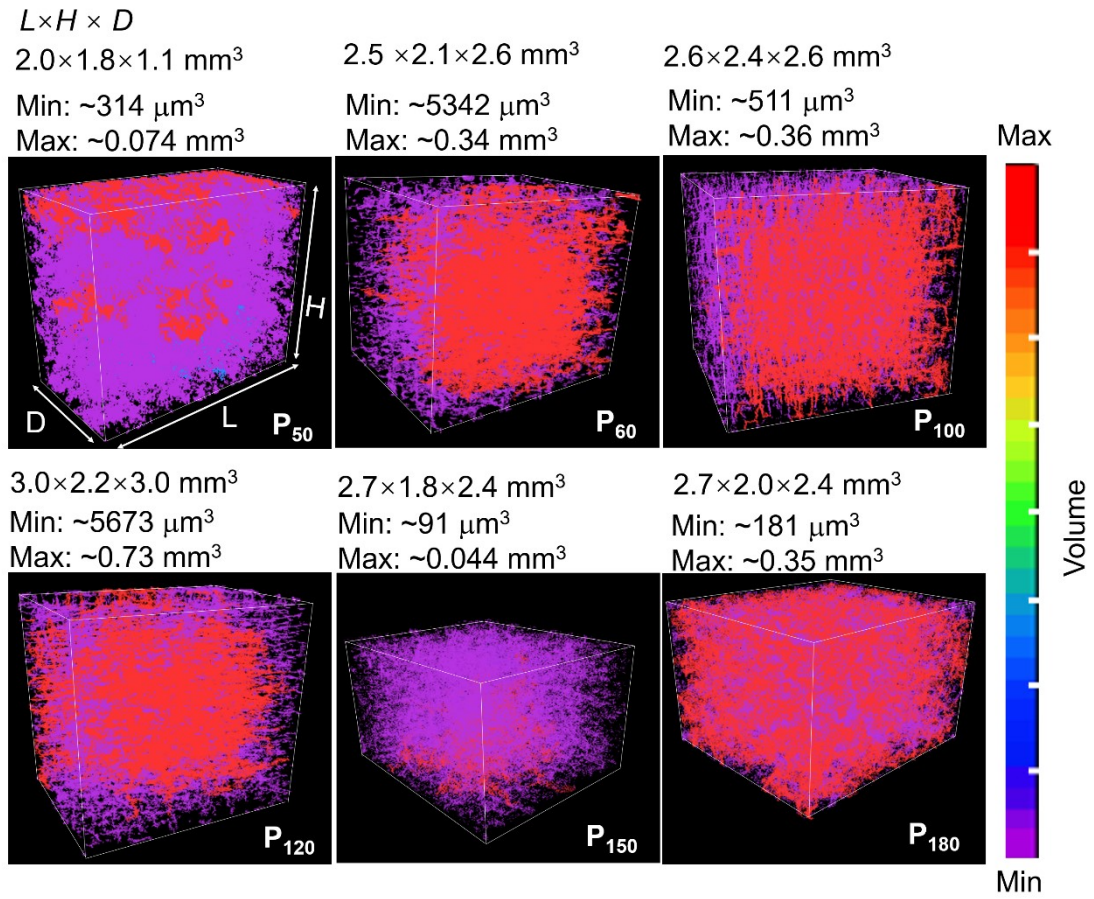

Fig. S10 3D reconstructed morphology of cracks via Mico-CT in L-PBF samples. The different colors represent the difference in the volume of cracks and pores.

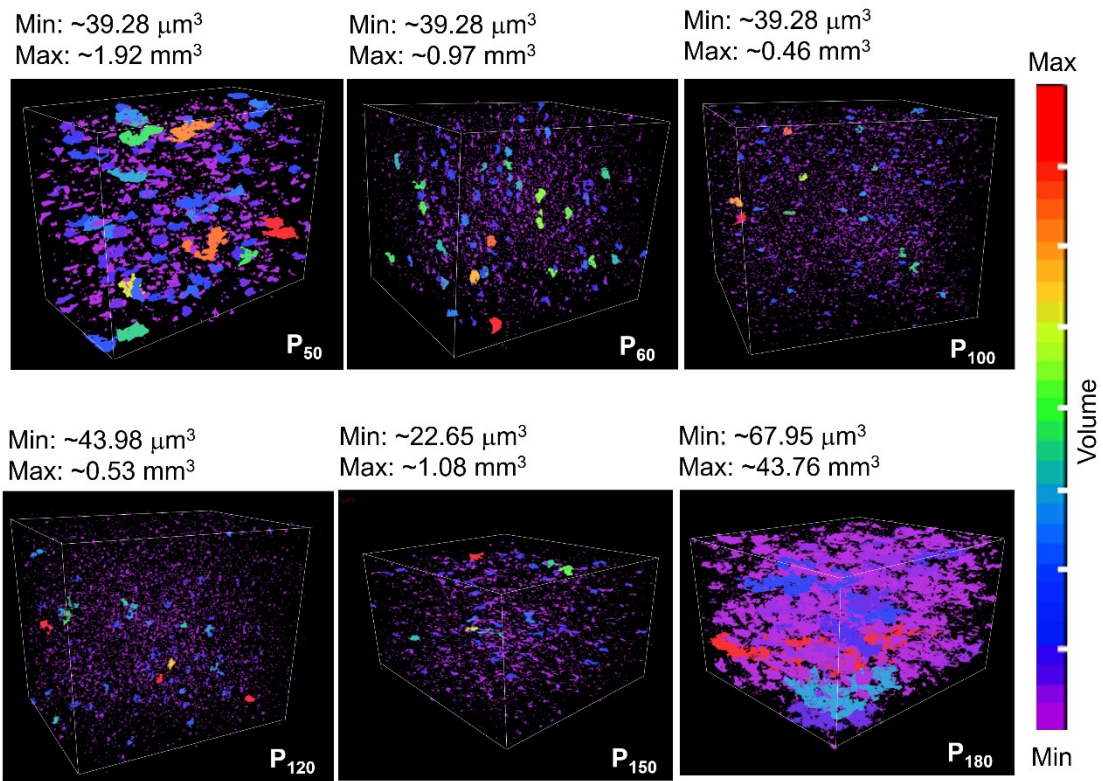

Fig. S11 3D reconstructed morphology of pores via Mico-CT in L-PBF samples. The different colors represent the difference in the volume of cracks and pores.

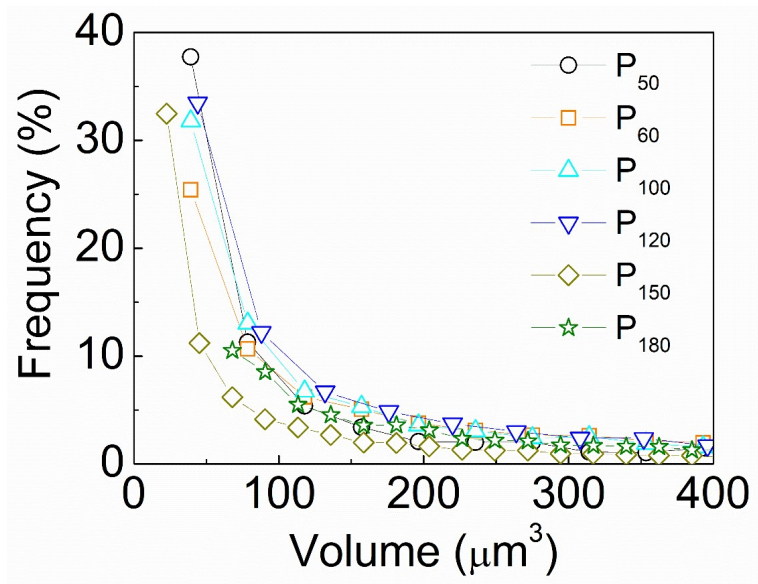

Fig. S12 Occurrence frequency of pore defects with different volumes in the L-PBF Ni-Mn-Sn samples.



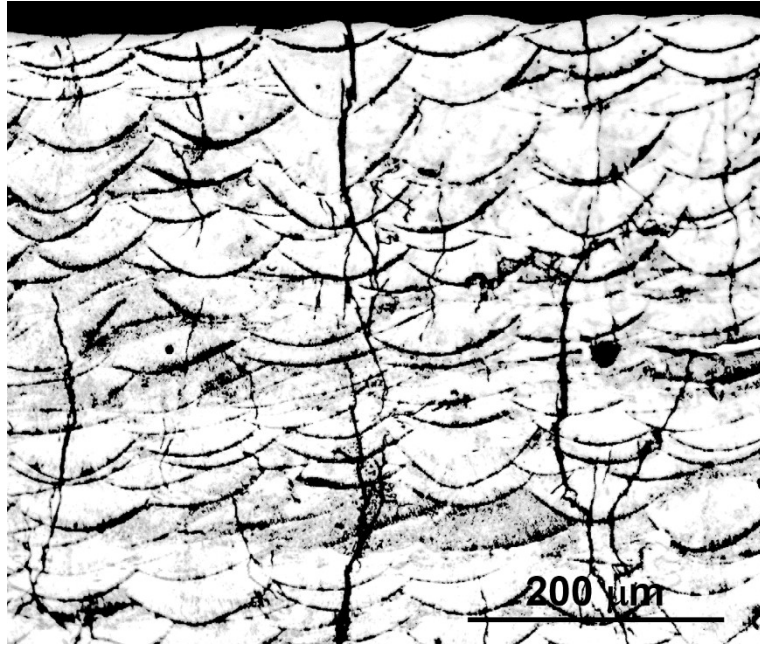

Fig. S13 The optical microscope image of melt pools in P<sub>150</sub> sample.

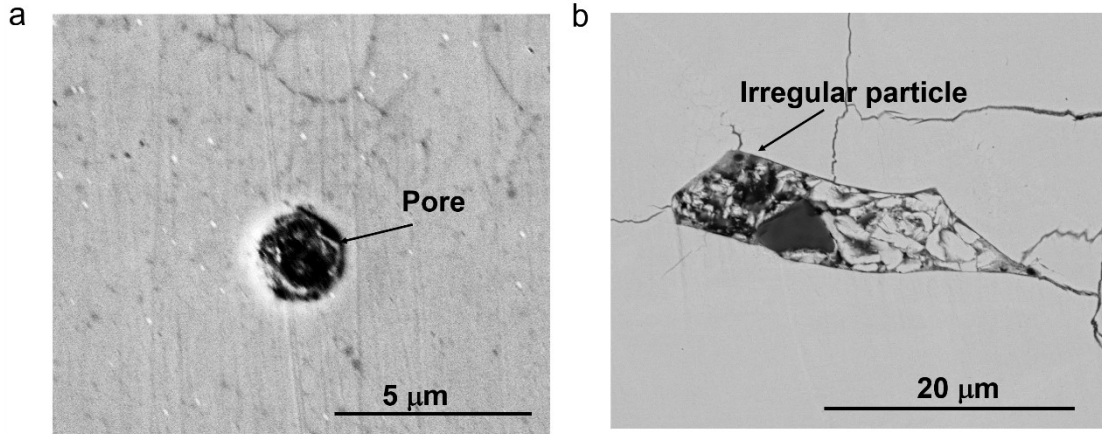

Fig. S14 (a) SEM image of gas pores defects. (b) SEM image of pore formed by spray particles without melting.

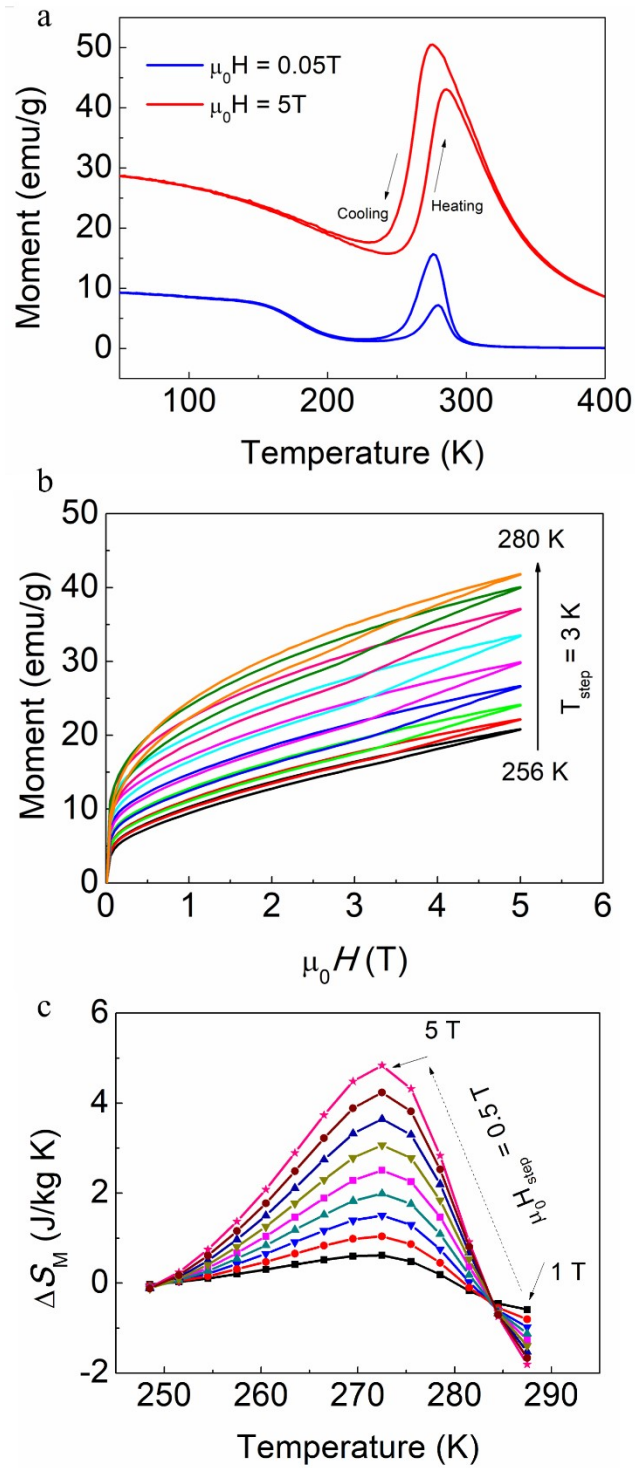

Fig. S15 (a) Magnetization vs. temperature ( $M$ - $T$ ) and (b) magnetization vs. field ( $M$ - $H$ ) curves for P180

sample. The entropy changes  $\Delta S_M$  were calculated from magnetization isothermals in (b) and plot as a

function of temperature under different magnetic field changes.
